# Supplementary material
Source: PubMed Central journal article supplement (PMC6146994)
Supplement: zam019188788s1.pdf [file zam019188788s1.pdf]

**Table S1. Accumulation of fumigaclavine C in strains of *Neosartorya fumigata***

| Strain/treatment                                 | Fumigaclavine C <sup>a</sup> |
|--------------------------------------------------|------------------------------|
| <i>N. fumigata</i> FGSC 1141                     | 2.1 ± 0.8                    |
| <i>dmaW</i> knockout                             | n.d. <sup>b</sup>            |
| <i>dmaW</i> knockout + <i>P. camemberti dmaW</i> | 1.5 ± 0.2                    |
| <i>easE</i> ko                                   | n.d.                         |
| <i>easE</i> knockout + <i>P. camemberti easE</i> | 1.2 ± 0.2                    |
| <i>easC</i> ko                                   | n.d.                         |
| <i>easC</i> knockout + <i>P. camemberti easC</i> | n.d.                         |

<sup>a</sup> μmol fumigaclavine C/cm<sup>2</sup> culture surface area; mean +/- standard deviation

<sup>b</sup> none detected; limit of detection 0.6 nmol/cm<sup>2</sup>

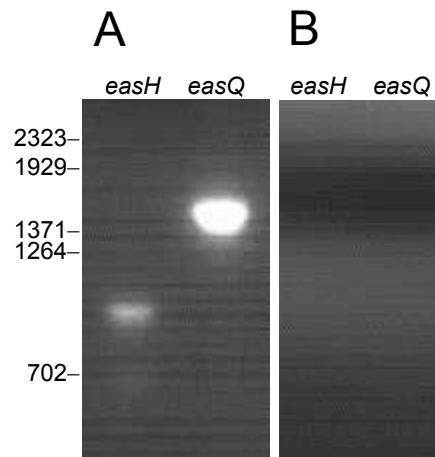

**FIG S1** PCR products amplified from (A) cDNA of the *easH/easQ* transformed *N. fumigata easA* knockout and lack of PCR products from (B) non-transformed *N. fumigata easA* knockout genomic DNA primed with same primer pairs. Products in lanes labeled *easH* and *easQ* were amplified with primer combinations 19 and 18 (Table 1) respectively. Primers for *easQ* flanked an intron, and the size (and DNA sequence) of the PCR product demonstrate it was derived from processed mRNA. Relative migration of *BstEII*-digested bacteriophage lambda fragments (sizes listed in bp) is provided as a length standard. Gels were run separately under similar conditions.

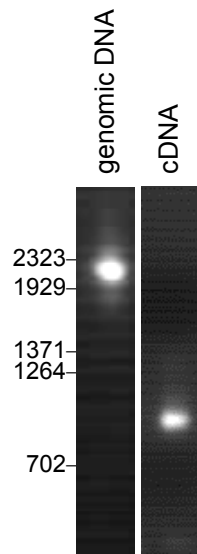

**FIG S2** PCR products amplified from genomic DNA or cDNA of *easH* transformed *N. fumigata easA* knockout. Product in lane labeled genomic DNA was amplified with primer combination 6 (Table 1), and the product in the lane labeled cDNA was amplified with primer combination 19 (Table 1). Relative migration of *Bst*EII-digested bacteriophage lambda fragments (sizes listed in bp) is provided as a length standard. Gels were run separately under similar conditions.

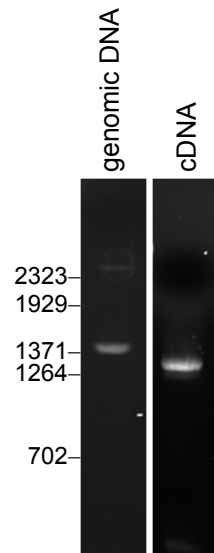

**FIG S3** PCR products amplified from genomic DNA or cDNA of *P. camemberti easC* transformed *N. fumigata easC* knockout. Both products were amplified with primer combination 15 (Table 1) from the indicated templates. Relative migration of *Bst*EII-digested bacteriophage lambda fragments (sizes listed in bp) is provided as a length standard. Gels were run separately under similar conditions.

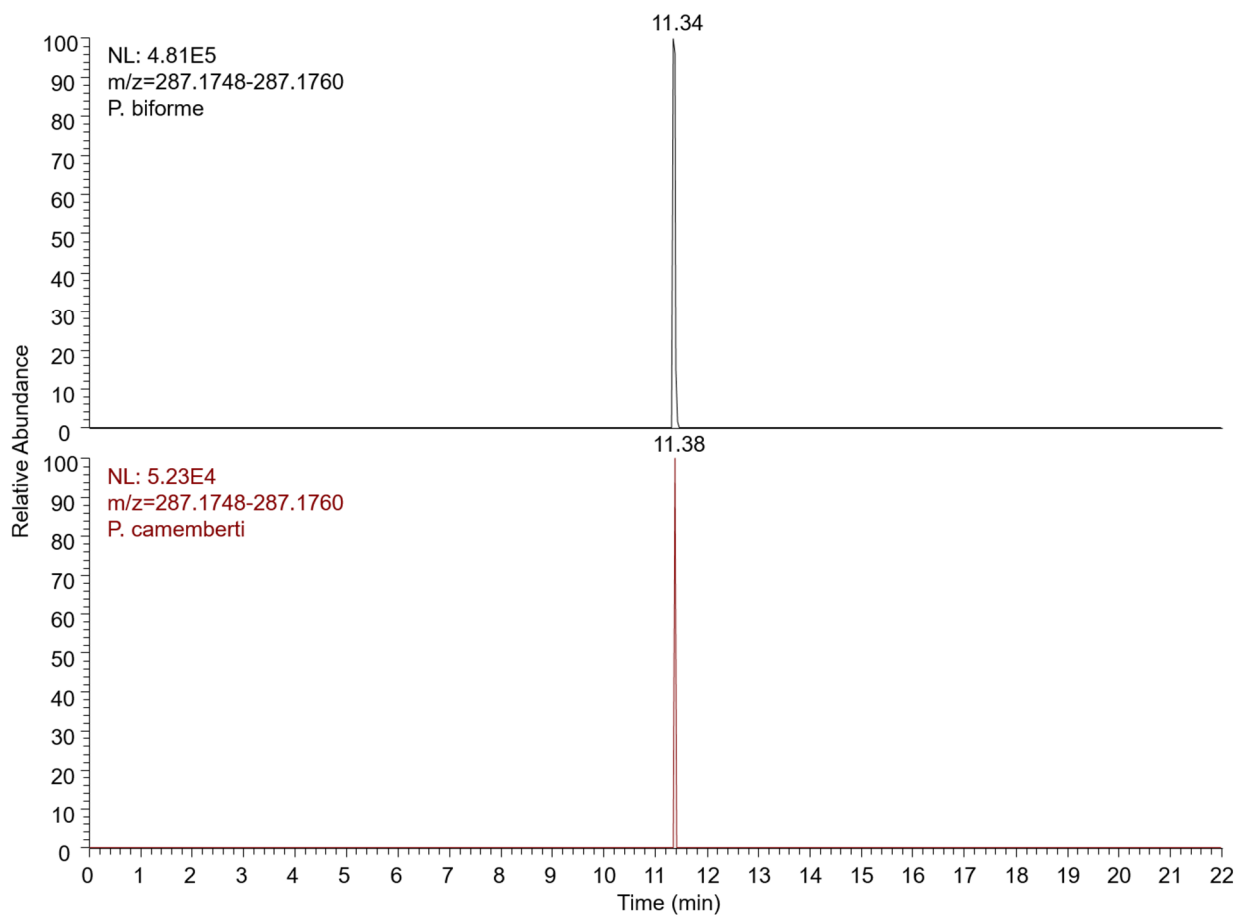

**FIG S4** Extracted ion chromatogram showing presence of an analyte matching the mass of N-Me-DMAT (<2 ppm mass error) in *P. biforme* and *P. camemberti* cultured *in vitro*. These data were acquired on a Thermo Scientific Q Exactive mass spectrometer.

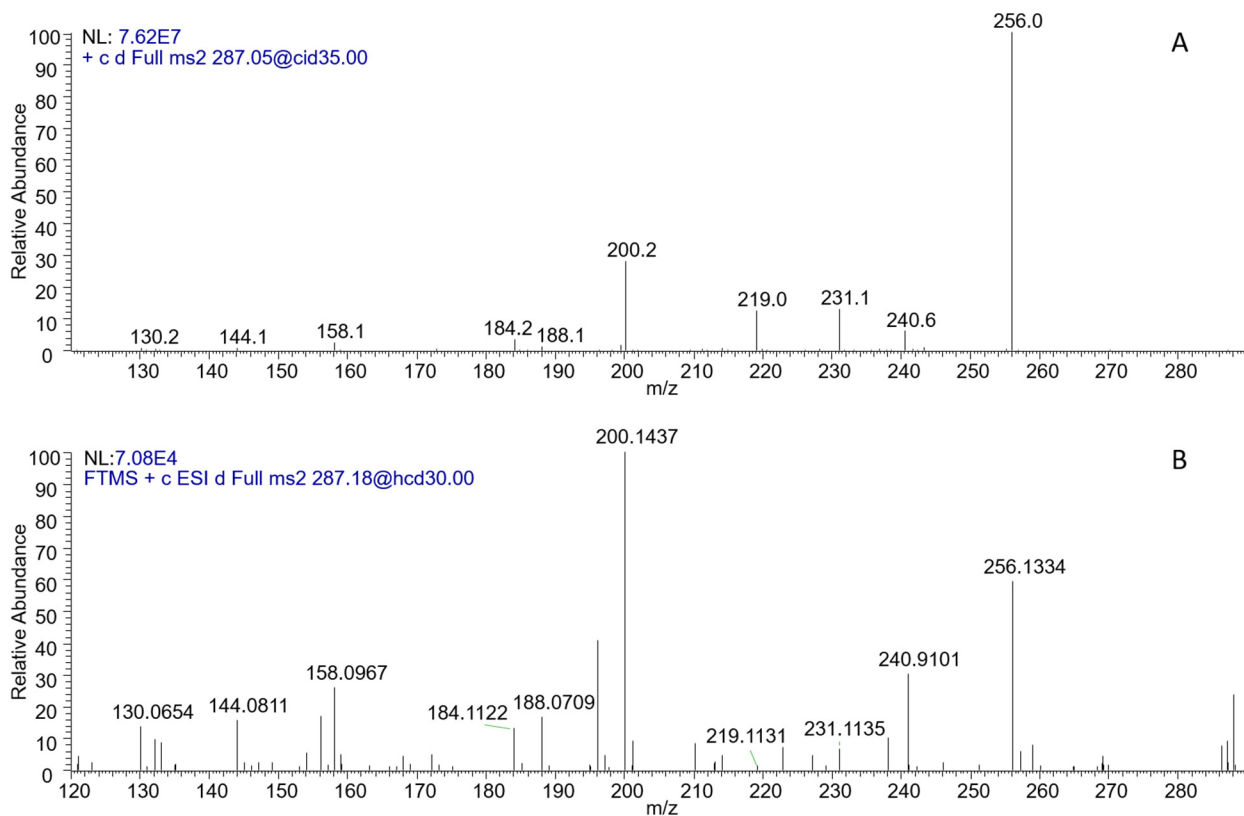

**FIG S5** Previously acquired MS/MS spectrum from an N-Me-DMAT standard (A), resulting from fragmentation of the parent ion  $m/z$  287.1. Data in panel A were acquired on a Thermo Scientific LCQ DecaXP mass spectrometer, using CID fragmentation. B) MS/MS spectrum acquired from the fragmentation of  $m/z$  287.18 isolated from *P. biforme*. Data in panel B were acquired on a Thermo Scientific Q Exactive mass spectrometer, using HCD fragmentation.
